# Supplementary material for: Prevalence of Prenatal Opioid Exposure in Ontario, Canada, 2014-2019
Source: PubMed Central journal article supplement (PMC7890532; doi:10.1001/jamanetworkopen.2020.37388), 2021-02-17
Supplement: jamanetwopen-e2037388-s001.pdf [file jamanetwopen-e2037388-s001.pdf]

## Supplementary Online Content

Camden A, Ray JG, To T, Gomes T, Bai L, Guttman A. Prevalence of prenatal opioid exposure in Ontario, Canada, 2014-2019. *JAMA Netw Open*. 2021;4(2):e2037388. doi:10.1001.jamanetworkopen.2020.37388

**eTable.** Methods Used in the Current Study to Describe Prenatal Opioid Exposure and Other Variables

This supplementary material has been provided by the authors to give readers additional information about their work.

**eTable. Methods used in the current study to describe prenatal opioid exposure and other variables**

| Measure                                 | Definition                                                                                                                                                                                            | Timing                                                                                   | Data source(s)                                                                                                                                                                                                                                                                                                                                                                                                                                                                                                                                                                                                                                                                                                                                                                                                                                                                                                                                                                                                                                                                                                                                                                                                                                                                                                                                                                                                                     |
|-----------------------------------------|-------------------------------------------------------------------------------------------------------------------------------------------------------------------------------------------------------|------------------------------------------------------------------------------------------|------------------------------------------------------------------------------------------------------------------------------------------------------------------------------------------------------------------------------------------------------------------------------------------------------------------------------------------------------------------------------------------------------------------------------------------------------------------------------------------------------------------------------------------------------------------------------------------------------------------------------------------------------------------------------------------------------------------------------------------------------------------------------------------------------------------------------------------------------------------------------------------------------------------------------------------------------------------------------------------------------------------------------------------------------------------------------------------------------------------------------------------------------------------------------------------------------------------------------------------------------------------------------------------------------------------------------------------------------------------------------------------------------------------------------------|
| <b>Prenatal opioid exposure</b>         |                                                                                                                                                                                                       |                                                                                          |                                                                                                                                                                                                                                                                                                                                                                                                                                                                                                                                                                                                                                                                                                                                                                                                                                                                                                                                                                                                                                                                                                                                                                                                                                                                                                                                                                                                                                    |
| Prenatal opioid exposure (POE)          | Any maternal prescribed opioid during pregnancy OR maternal opioid-related hospital care during pregnancy OR outpatient visits for Opioid Agonist Therapy (OAT) OR neonatal abstinence syndrome (NAS) | Conception to delivery; NAS - Newborn birth episode; re-admission within 14 days of life | NMS, DAD, NACRS, OHMRS, OHIP<br><br>Validation studies have demonstrated these databases are complete and accurate: Canadian Institute for Health Information, CIHI Data Quality Study of the 2006–2007 Discharge Abstract Database (Ottawa, Ont.: CIHI, 2009). Martin L, Hirdes J, Morris J, Montague P, Rabinowitz T, Fries B. Validating the Mental Health Assessment Protocols (MHAPs) in the Resident Assessment Instrument Mental Health (RAI-MH). <i>J Psychiatr Ment Health Nurs</i> 2009; 16: 646–53. Schull MJ, Azimae M, Marra M, Cartagena RG, Vermeulen MJ, Ho M, Guttmann A. ICES: Data, Discovery, Better Health. <i>International Journal of Population Data Science</i> . 2019;4(2).<br>NMS (hyperlink: <a href="https://datadictionary.ices.on.ca/Applications/DataDictionary/Library.aspx?Library=NMS">https://datadictionary.ices.on.ca/Applications/DataDictionary/Library.aspx?Library=NMS</a> )<br><br>Martins, D., Singh, S., Khuu, W., Tadrous, M., Paterson, M., Juurlink, D., Mamdani, M. and Gomes, T. (2018) “Linking the Narcotics Monitoring System Database to Quantify the Contribution of Prescribed and Non-Prescribed Opioids to Opioid Overdoses in Ontario, Canada”, <i>International Journal of Population Data Science</i> , 3(4). doi: 10.23889/ijpds.v3i4.644.<br><br>Note: NMS may be missing prescriptions from people without a health card or Indigenous peoples with a status card. |
| Any maternal prenatal prescribed opioid | Any prescription dispensed for an opioid analgesic OR methadone OR buprenorphine for OAT OR opioids for cough                                                                                         | Conception to delivery; Trimester                                                        |                                                                                                                                                                                                                                                                                                                                                                                                                                                                                                                                                                                                                                                                                                                                                                                                                                                                                                                                                                                                                                                                                                                                                                                                                                                                                                                                                                                                                                    |

| Measure                                                             | Definition                                                                                                                                                                       | Timing                                                                                  | Data source(s)                                                                                                                                                                                                                                                                                                                                                                                                                                                                                                                                                                                                                                          |
|---------------------------------------------------------------------|----------------------------------------------------------------------------------------------------------------------------------------------------------------------------------|-----------------------------------------------------------------------------------------|---------------------------------------------------------------------------------------------------------------------------------------------------------------------------------------------------------------------------------------------------------------------------------------------------------------------------------------------------------------------------------------------------------------------------------------------------------------------------------------------------------------------------------------------------------------------------------------------------------------------------------------------------------|
| Any maternal prenatal prescription for opioid analgesic for pain    | Any prescription for opioid analgesics for pain (morphine, codeine, oxycodone, hydrocodone, hydromorphone, meperidine, tramadol, methadone, buprenorphine, fentanyl, tapentadol) | Conception to delivery; Trimester                                                       | NMS                                                                                                                                                                                                                                                                                                                                                                                                                                                                                                                                                                                                                                                     |
| Any maternal prenatal prescription for Opioid Agonist Therapy (OAT) | Any prescription for methadone OR buprenorphine for OAT                                                                                                                          | Conception to delivery; Trimester                                                       | NMS                                                                                                                                                                                                                                                                                                                                                                                                                                                                                                                                                                                                                                                     |
| Any maternal prenatal prescription for methadone                    | Any prescription for methadone for OAT                                                                                                                                           | Conception to delivery; Trimester                                                       | NMS                                                                                                                                                                                                                                                                                                                                                                                                                                                                                                                                                                                                                                                     |
| Any maternal prenatal prescription for buprenorphine                | Any prescription for buprenorphine for OAT                                                                                                                                       | Conception to delivery; Trimester                                                       | NMS                                                                                                                                                                                                                                                                                                                                                                                                                                                                                                                                                                                                                                                     |
| Any maternal prenatal prescription for opioids for cough            | Any prescription for opioids for cough                                                                                                                                           | Conception to delivery; Trimester                                                       | NMS                                                                                                                                                                                                                                                                                                                                                                                                                                                                                                                                                                                                                                                     |
| Maternal opioid-related hospital care                               | ICD-10 F11, T40.0-T40.4, T40.6, DSM-5 304.00, 305.50, Y45.0                                                                                                                      | 2 years prior to conception; Pregnancy (conception to discharge of the delivery record) | DAD (hyperlink: <a href="https://datadictionary.ices.on.ca/Applications/DataDictionary/Library.aspx?Library=DAD">https://datadictionary.ices.on.ca/Applications/DataDictionary/Library.aspx?Library=DAD</a> ), NACRS (hyperlink: <a href="https://datadictionary.ices.on.ca/Applications/DataDictionary/Library.aspx?Library=NACRS">https://datadictionary.ices.on.ca/Applications/DataDictionary/Library.aspx?Library=NACRS</a> ), OHMRS (hyperlink: <a href="https://datadictionary.ices.on.ca/Applications/DataDictionary/Library.aspx?Library=OMHRS">https://datadictionary.ices.on.ca/Applications/DataDictionary/Library.aspx?Library=OMHRS</a> ) |
| Newborn hospital records with NAS                                   | ICD-10 P96.1 – Withdrawal from maternal drugs of addiction OR ICD-10 P04.4 – Infant affected by maternal drugs of addiction                                                      | Newborn birth episode; re-admission within 14 days of life                              | DAD<br>Guttman A, Blackburn R, Amartey A, Zhou L, Wijlaars L, Saunders N, Harron K, Chiu M, Gilbert R. Long-term mortality in mothers of infants with neonatal abstinence syndrome: A population-based parallel-cohort study in England and Ontario, Canada. PLoS medicine. 2019 Nov 26;16(11):e1002974.                                                                                                                                                                                                                                                                                                                                                |

| <b>Measure</b>                                    | <b>Definition</b>                                                                                                                                                                                                                                         | <b>Timing</b>               | <b>Data source(s)</b>                                                                                                                                                                                                        |
|---------------------------------------------------|-----------------------------------------------------------------------------------------------------------------------------------------------------------------------------------------------------------------------------------------------------------|-----------------------------|------------------------------------------------------------------------------------------------------------------------------------------------------------------------------------------------------------------------------|
| Presumed illicit opioid use                       | NAS diagnostic codes in newborn hospital record or maternal-opioid related hospital care during pregnancy and no record of prescribed opioids or outpatient OAT visits                                                                                    | Conception to delivery      | NMS, DAD, NACRS, OHMRS, OHIP                                                                                                                                                                                                 |
| Outpatient Opioid Agonist Therapy (OAT)           | Any of: K682 (Opioid agonist maintenance program monthly management fee – intensive); K683 (Opioid agonist maintenance program monthly management fee – maintenance); K684 (Opioid agonist maintenance program monthly management fee - team maintenance) | Conception to delivery      | OHIP                                                                                                                                                                                                                         |
| Any OAT                                           | Any of: Outpatient Opioid Agonist Therapy, prescription for methadone, prescription for buprenorphine                                                                                                                                                     | Conception to delivery      | OHIP, NMS                                                                                                                                                                                                                    |
| <b>Maternal substance use-related health care</b> |                                                                                                                                                                                                                                                           |                             |                                                                                                                                                                                                                              |
| Any tobacco                                       | ICD-10 F17, T65.2, Z72.0, Z71.6, OHIP DXCODE 305                                                                                                                                                                                                          | 2 years prior to conception | DAD, NACRS, OHIP (hyperlink: <a href="https://datadictionary.ices.on.ca/Applications/DataDictionary/Library.aspx?Library=OHIP">https://datadictionary.ices.on.ca/Applications/DataDictionary/Library.aspx?Library=OHIP</a> ) |
| Any alcohol                                       | OHIP DXCODE: 291, 303, ICD10CA G62.1, G31.2, G72.1, I42.6, K29.2, K85.2, K70, K86.0, E24.4, F10, X45, X65, Y15, T51, R78.0, Y90, Y91, Z72.1, Z71.4                                                                                                        | 2 years prior to conception | DAD, NACRS, OHIP                                                                                                                                                                                                             |
| Any non-opioid/multi-drug use                     | ICD-10 F12, T40.7, F13, F14, T40.5, R78.2, F15, T43, F16, T40.8, T40.9, F18, F19, Z72.2, Z71.5, OHIP DXCODE 292, 304                                                                                                                                      | 2 years prior to conception | DAD, NACRS, OHIP                                                                                                                                                                                                             |
| <b>Social factors</b>                             |                                                                                                                                                                                                                                                           |                             |                                                                                                                                                                                                                              |
| Homelessness as recorded on health care records   | The record meets any following criteria: (1) DAD: ICD-10 Z590 or homeless=Y or postal code=XX; (2) NACRS: ICD-10 Z590 or residence type= Homeless or postal code=XX; (3) OMHRS: usual residence= Homeless (with or without shelter)                       | 2 years prior to conception | DAD, NACRS, OMHRS                                                                                                                                                                                                            |

| <b>Measure</b>                                                                                          | <b>Definition</b>                                                                                                                                                                                                                                                                                                                                                                                                    | <b>Timing</b>               | <b>Data source(s)</b>                                                                                                                                                                                                     |
|---------------------------------------------------------------------------------------------------------|----------------------------------------------------------------------------------------------------------------------------------------------------------------------------------------------------------------------------------------------------------------------------------------------------------------------------------------------------------------------------------------------------------------------|-----------------------------|---------------------------------------------------------------------------------------------------------------------------------------------------------------------------------------------------------------------------|
| Health care received while involved with the criminal justice system as recorded on health care records | The record meets any following criteria:<br>(1) institution in OHIP with institution type =Correctional Centre.<br>(2) institution number in DAD with institution type =Correctional Centre and referred from law enforcement<br>(3)instfnum in NACRS with institution type=Correctional Centre and referred from a Legal service.<br>(4) Last 4 digits of X65 in OMHRS with institution type = Correctional Centre. | 2 years prior to conception | OHIP, DAD, NACRS, OMHRS                                                                                                                                                                                                   |
| Violence-related health care use                                                                        | ICD-10: X85-X99, Y00-Y09, Y871, T740-T749                                                                                                                                                                                                                                                                                                                                                                            | 2 years prior to conception | NACRS, DAD                                                                                                                                                                                                                |
| <b>Demographics</b>                                                                                     |                                                                                                                                                                                                                                                                                                                                                                                                                      |                             |                                                                                                                                                                                                                           |
| Maternal age at first delivery (years)                                                                  |                                                                                                                                                                                                                                                                                                                                                                                                                      | Index delivery              | MOMBABY (hyperlink: <a href="https://datadictionary.ices.on.ca/Applications/DataDictionary/Library.aspx?Library=MOMBABY">https://datadictionary.ices.on.ca/Applications/DataDictionary/Library.aspx?Library=MOMBABY</a> ) |
| Maternal age at current delivery (years)                                                                |                                                                                                                                                                                                                                                                                                                                                                                                                      | Index delivery              | MOMBABY                                                                                                                                                                                                                   |
| 3+ previous livebirths                                                                                  | Number of previous livebirths derived from all mom's records                                                                                                                                                                                                                                                                                                                                                         | Index delivery              | MOMBABY                                                                                                                                                                                                                   |
| Area-level lowest income (Quintile 1)                                                                   | Groups: Quintile 1 (lowest)-Quintile 5 (highest), missing data (represents suppressed) were re-coded to Quintile. Note: Missing data are suppressed for neighbourhoods with high residential instability, which are most likely to be low income and urban.                                                                                                                                                          | Conception                  | RPDB (hyperlink: <a href="https://datadictionary.ices.on.ca/Applications/DataDictionary/Library.aspx?Library=RPDB">https://datadictionary.ices.on.ca/Applications/DataDictionary/Library.aspx?Library=RPDB</a> ), PCCF+   |
| Rural residence                                                                                         | <10,000 residents, missing data were re-coded as urban<br>Note: Missing data are suppressed for neighbourhoods with high residential instability, which are most likely to be low income and urban.                                                                                                                                                                                                                  | Conception                  | PCCF+                                                                                                                                                                                                                     |

| Measure                                       | Definition                                                                                                                                                                                                                                                                                                                                                                                                                                     | Timing                | Data source(s)                                                                                                                                                                                                                                                                                                                                                                                                                                                                                                                           |
|-----------------------------------------------|------------------------------------------------------------------------------------------------------------------------------------------------------------------------------------------------------------------------------------------------------------------------------------------------------------------------------------------------------------------------------------------------------------------------------------------------|-----------------------|------------------------------------------------------------------------------------------------------------------------------------------------------------------------------------------------------------------------------------------------------------------------------------------------------------------------------------------------------------------------------------------------------------------------------------------------------------------------------------------------------------------------------------------|
| Immigrant to Canada or recent OHIP registrant | Immigrant to Canada or recent OHIP registrant from June 2017-December 2019                                                                                                                                                                                                                                                                                                                                                                     | Conception            | RPDB, IRCC Permanent Resident Database (hyperlink: <a href="https://datadictionary.ices.on.ca/Applications/DataDictionary/Library.aspx?Library=CIC">https://datadictionary.ices.on.ca/Applications/DataDictionary/Library.aspx?Library=CIC</a> )<br>Chiu M, Lebenbaum M, Lam K, et al. Describing the linkages of the immigration, refugees and citizenship Canada permanent resident data and vital statistics death registry to Ontario's administrative health database. BMC medical informatics and decision making. 2016;16(1):135. |
| <b>Pre-pregnancy morbidity</b>                |                                                                                                                                                                                                                                                                                                                                                                                                                                                |                       |                                                                                                                                                                                                                                                                                                                                                                                                                                                                                                                                          |
| High medical comorbidities                    | Johns Hopkins ADG score of 10+                                                                                                                                                                                                                                                                                                                                                                                                                 | 2 years preconception | DAD, NACRS, OHIP                                                                                                                                                                                                                                                                                                                                                                                                                                                                                                                         |
| Pain                                          | ICD-10: M54.5 (low back pain) or Abdominal pain (R10), G43, G44 (migraine/headache), rheumatoid arthritis (ICES-derived cohort), M79.7 (fibromyalgia), M25.5, M25.50-M25.59, K07.63, K07.69 (joint pain), K86.0, K86.1 (chronic pancreatitis), E10.41, E11.41, E13.41, E14.41 (peripheral neuropathy), D57.1, D57.2, D57.3, D57.8 (sickle cell disease), N20.0, N20.1, N20.2, N20.9, N21.0, N21.1, N21.8, N21.9, N22.0, N22.8 (renal calculus) | 2 years preconception |                                                                                                                                                                                                                                                                                                                                                                                                                                                                                                                                          |

| <b>Measure</b>                                                     | <b>Definition</b>                                                                                                                                                                                                                                                                                                                                                                                                                                                                                                                     | <b>Timing</b>          | <b>Data source(s)</b> |
|--------------------------------------------------------------------|---------------------------------------------------------------------------------------------------------------------------------------------------------------------------------------------------------------------------------------------------------------------------------------------------------------------------------------------------------------------------------------------------------------------------------------------------------------------------------------------------------------------------------------|------------------------|-----------------------|
| Any mental health hospitalization or emergency department visit    | ICD-10 (DAD/NACRS)<br>DX10CODE1= F06-F09, F20-F99 or<br>DX10CODE2-DX10CODE10 = X60-<br>X84, Y10-Y19, Y28 when<br>DX10CODE1 not equal to F06-F99;<br>ICD-9-CM (OMHRS) Any OMHRS<br>(including missing, except for 290.x,<br>294.x in primary diagnosis). If primary<br>dx missing and provisional=17,<br>exclude; OMHRS prior to 2016/17 Any<br>OMHRS (including missing, except for<br>290.x, 294.x in primary diagnosis). If<br>primary dx missing and provisional=2,<br>exclude Self-harm, anxiety, mood<br>disorder, schizophrenia | 2 years preconception  | DAD, NACRS, OMHRS     |
| <b>Pregnancy-related variables</b>                                 |                                                                                                                                                                                                                                                                                                                                                                                                                                                                                                                                       |                        |                       |
| Fetal ultrasound by 20 weeks                                       | OHIP FEECODE: J157-J160, J457-460                                                                                                                                                                                                                                                                                                                                                                                                                                                                                                     | Conception to delivery | OHIP                  |
| Prenatal care visit in the first trimester                         | Fee Code in (A, K, P003, P004, P005)<br>and billed by an MD with Speciality<br>Code 00 (General Practice), or Code 20<br>(Obstetrics and Gynaecology)                                                                                                                                                                                                                                                                                                                                                                                 | Conception to delivery | OHIP                  |
| Proportion of days in pregnancy covered by prescription opioid use | Number of days in pregnancy covered<br>by prescription opioid use / total<br>number of days in pregnancy                                                                                                                                                                                                                                                                                                                                                                                                                              | Conception to delivery | NMS                   |

Abbreviations: IRCC=Immigration, Refugees and Citizenship Canada Permanent Resident; DAD=Discharge Abstract Database; NACRS=National Ambulatory Care Reporting System; OHIP=Ontario Health Insurance Plan; OMHRS=Ontario Mental Health Reporting System; NMS=Narcotics Monitoring System; RPDB=Registered Persons Database; PCCF+=Postal Code Conversion File.
